# Supplementary material
Source: PubMed Central journal article supplement (PMC3325734)
Supplement: 1116410109_pnas.201116410SI.pdf [file 1116410109_pnas.201116410SI.pdf]

# Supporting Information

Brown Kav et al. 10.1073/pnas.1116410109

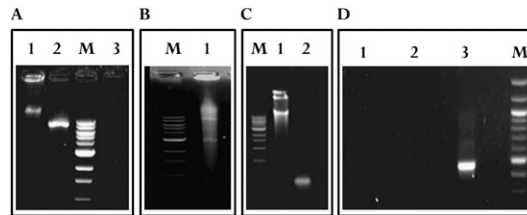

**Fig. S1.** Phi29 polymerase amplification of plasmid DNA. (A) Phi29 polymerase amplifies circular DNA in a selective manner. 1, Phi29 polymerase amplification of plasmid pME6031 extracted from *Escherichia coli* TG1 (*E. coli* vector, ~8,300 bp) treated with Plasmid Safe DNase; 2, digestion of the phi29 amplification product of pME6031 plasmid with BamHI, a unique site in plasmid pME6031; M, 1-kb ladder; 3, Phi29 polymerase amplification of *E. coli* TG1 genomic DNA treated with Plasmid Safe DNase. (B) Purification of the plasmid population from rumen-isolated bacteria (*Materials and Methods*). M, 1-kb ladder; 1, rumen-purified plasmids. (C) Phi29 polymerase amplification of rumen-purified plasmids. M, 1-kb ladder; 1, Phi29 polymerase-amplified rumen plasmid DNA; 2, negative control, water as template. (D) 16S rRNA PCR analysis. 1, Phi29 polymerase-amplified plasmid DNA; 2, negative control (water as template); 3, rumen plasmid DNA untreated by DNase or Phi29.

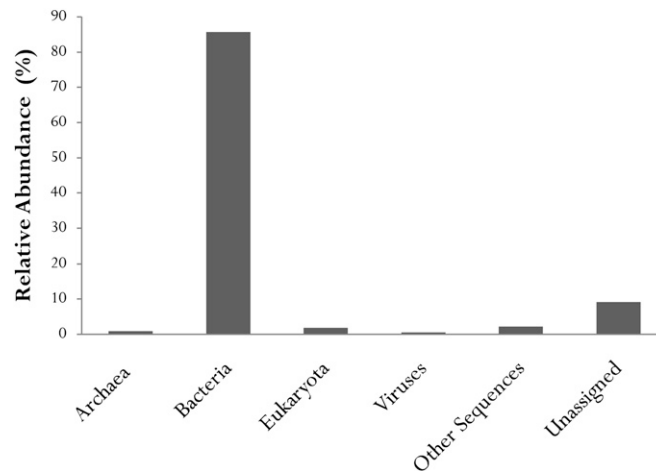

**Fig. S2.** Domain analysis of the rumen plasmidome by MG-RAST using similarity to the SEED database with a maximum E-value of  $<10^{-5}$ .







**Table S2.**  $\chi^2$  statistic *P* values for the comparative functional analysis of the rumen plasmidome vs. rumen metagenomes and plasmid databases (Fig. 2)

| SEED subsystem                | Brulc et al. (1) | Hess et al. (2) | ACLAME   | IMG      |
|-------------------------------|------------------|-----------------|----------|----------|
| Amino acids                   | NS               | NS              | 1.79E-05 | 4.51E-05 |
| Carbohydrates                 | NS               | NS              | NS       | 0.016049 |
| Cell division and cell cycle  | NS               | NS              | NS       | NS       |
| Cell wall and capsule         | NS               | NS              | 0.00017  | 0.000212 |
| Cofactors, vitamins, etc.     | NS               | NS              | 0.000583 | 0.000212 |
| DNA metabolism                | 0.046556         | NS              | 0.002345 | 0.000342 |
| Fatty acids and lipids        | NS               | NS              | NS       | NS       |
| Membrane transport            | 0.040827         | NS              | NS       | 3.64E-05 |
| Aromatic compounds            | NS               | NS              | NS       | NS       |
| Motility and chemotaxis       | NS               | NS              | NS       | 0.018521 |
| Nitrogen metabolism           | NS               | NS              | NS       | NS       |
| Nucleosides and nucleotides   | NS               | NS              | NS       | NS       |
| Mobile genetic elements       | NS               | NS              | 1.48E-14 | 0.019629 |
| Protein metabolism            | NS               | NS              | 3.98E-08 | 1.59E-06 |
| RNA metabolism                | NS               | NS              | NS       | NS       |
| Regulation and cell signaling | NS               | NS              | NS       | NS       |
| Respiration                   | NS               | NS              | NS       | 0.035336 |
| Stress response               | NS               | NS              | NS       | NS       |
| Sulfur metabolism             | NS               | NS              | NS       | NS       |
| Virulence                     | NS               | NS              | NS       | NS       |

Differences in the abundances of the each SEED subsystem compared with the rumen plasmidome were tested using  $\chi^2$  statistics. The *P* values for differences of each subsystem between the rumen plasmidome and the other datasets are mentioned. NS, not significant.

1. Brulc JM, et al. (2009) Gene-centric metagenomics of the fiber-adherent bovine rumen microbiome reveals forage specific glycoside hydrolases. *Proc Natl Acad Sci USA* 106:1948–1953.
2. Hess M, et al. (2011) Metagenomic discovery of biomass-degrading genes and genomes from cow rumen. *Science* 331:463–467.

**Table S3.** Proportion of annotated contigs

| Database                              | CDD   | Protein NR | Nucleotide NR | ACLAME (only genes) | IMG (only plasmid genes) |
|---------------------------------------|-------|------------|---------------|---------------------|--------------------------|
| Percentage of contigs with annotation | 22.3% | 28.7%      | 3.8%          | 23.3%               | 26%                      |

The percentage of SOAP de novo contigs with annotations in each of the five databases: ACLAME, A Classification of Mobile Genetic Elements; CDD, Conserved Domain database; IMG, Integrated Microbial Genome database; Nucleotide NR, National Center for Biotechnology Information (NCBI) nucleotide nonredundant; Protein NR, NCBI protein nonredundant.

**Table S4. Previously isolated plasmids from terrestrial aquatic and rumen environment**

| Source                             | Bacterial species                | Plasmid                       | Reference                  |             |
|------------------------------------|----------------------------------|-------------------------------|----------------------------|-------------|
| Rumen-isolated bacteria            | <i>Selenomonas ruminantium</i>   | pONE430                       | GI32455406                 |             |
|                                    | <i>Selenomonas ruminantium</i>   | pONE429                       | GI32455408                 |             |
|                                    | <i>Selenomonas ruminantium</i>   | pJW1                          | GI4809199                  |             |
|                                    | <i>Selenomonas ruminantium</i>   | pSR1                          | GI 5739173                 |             |
|                                    | <i>Selenomonas ruminantium</i>   | pSRD191                       | GI50659892                 |             |
|                                    | <i>Selenomonas ruminantium</i>   | pJDB23                        | Attwood and<br>Brooker (1) |             |
|                                    | <i>Prevotella ruminicola</i>     | pRAM4                         | GI10956058                 |             |
|                                    | <i>Lactobacillus plantarum</i>   | pLD1                          | GI225166856                |             |
|                                    | <i>Butyrivibrio fibrisolvens</i> | pRJF1                         | GI209808771                |             |
|                                    | <i>Butyrivibrio fibrisolvens</i> | pRJF2                         | GI209808768                |             |
|                                    | <i>Butyrivibrio fibrisolvens</i> | pOM1                          | GI468363                   |             |
|                                    | <i>Ruminococcus flavefaciens</i> | pBAW301                       | GI:726294                  |             |
|                                    | Terrestrial-isolated bacteria    | <i>Ralstonia solanacearum</i> | pJTPS1                     | GI10954629  |
|                                    |                                  | <i>Ralstonia solanacearum</i> | pRSI13                     | GI300698618 |
| <i>Burkholderia cenocepacia</i>    |                                  | pBCJ2315                      | GI206479926                |             |
| <i>Pseudomonas putida</i>          |                                  | pDTG1                         | GI32469878                 |             |
| <i>Pseudomonas putida</i>          |                                  | pYQ39                         | GI32469969                 |             |
| <i>Pseudomonas putida</i>          |                                  | pPP81                         | GI10954624                 |             |
| <i>Bacillus subtilis</i>           |                                  | p1414                         | GI10956512                 |             |
| <i>Bacillus subtilis</i>           |                                  | pTA1015                       | GI10956497                 |             |
| <i>Bacillus subtilis</i>           |                                  | pTA1040                       | GI10956489                 |             |
| <i>Bacillus subtilis</i>           |                                  | pTA1060                       | GI10956503                 |             |
| <i>Bacillus licheniformis</i>      |                                  | pFL7                          | GI40445271                 |             |
| <i>Bacillus licheniformis</i>      |                                  | pFL5                          | GI40804652                 |             |
| <i>Corynebacterium diphtheriae</i> |                                  | pNG2                          | GI32470491                 |             |
| <i>Staphylococcus aureus</i>       |                                  | pUB110                        | GI150521                   |             |
| Aquatic-isolated bacteria          | <i>Synechococcus</i> sp.         | pAQ1                          | GI170079460                |             |
|                                    | <i>Synechococcus</i> sp.         | pAQ3                          | GI170079464                |             |
|                                    | <i>Synechococcus elongatus</i>   | pUH24                         | GI32455412                 |             |
|                                    | <i>Eromonas salmonicida</i>      | pAsa3                         | GI32186818                 |             |
|                                    | <i>Eromonas salmonicida</i>      | pAsa2                         | GI32186830                 |             |
|                                    | <i>Eromonas salmonicida</i>      | pAsa1                         | GI32186809                 |             |
|                                    | <i>Vibrio fischeri</i>           | pES213                        | GI42794283                 |             |
|                                    | <i>Vibrio</i> sp.                | pPS41                         | GI5817769                  |             |
|                                    | <i>Methylophaga thalassica</i>   | pMTS1                         | GI10956807                 |             |
|                                    | <i>Vibrio vulnificus</i>         | pMP1                          | GI82791436                 |             |
|                                    | <i>Synechococcus</i> sp.         | pSY10                         | GI216847                   |             |
|                                    | <i>Methylophaga thalassica</i>   | pMTS1                         | GI10956807                 |             |
|                                    | <i>Shewanella</i> sp.            | pSFKW33                       | GI222692192                |             |
|                                    | <i>Leptolyngbya</i> sp.          | pRF1                          | GI32455760                 |             |

The sequences of plasmids previously isolated from three different environments were downloaded from the NCBI nucleotide database. Three different datasets were generated: rumen-isolated plasmids, terrestrial-isolated plasmids and aquatic-isolated plasmids (Table S5). Each of the datasets were compared with the rumen plasmidome using TBLASTX with a maximum E-value of  $\leq 10^{-3}$ . When hits overlapped, the best hit (lowest E-value) was selected. Finally, the number of contigs of the rumen plasmidome which were hit by the different plasmids in the dataset was counted.

1. Attwood GT, Brooker JD (1992) Complete nucleotide sequence of a *Selenomonas ruminantium* plasmid and definition of a region necessary for its replication in *Escherichia coli*. *Plasmid* 28(2):123–129.

**Table S5. Number of rumen plasmidome contigs with hits in the different plasmid datasets**

|                                               | Aquatic | Terrestrial | Rumen |
|-----------------------------------------------|---------|-------------|-------|
| Number of contigs with hits from each dataset | 20*     | 59*         | 338*  |

See legend for Table S4. The difference in the number of hits for each contig was measured using  $\chi^2$  statistics and was found to be significantly different. Asterisk (\*) indicates significant difference at  $P < 0.05$ .



Table S6. Cont.

| Contig       | Mosaic nature | ORF 1                                                          | ORF 2                                                    | ORF 3                          | ORF 4                     |
|--------------|---------------|----------------------------------------------------------------|----------------------------------------------------------|--------------------------------|---------------------------|
| Scaffold651  | Order         | Bacteroidetes; Bacteroidia;<br>Bacteroidales                   | Bacteroidetes; Bacteroidia;<br>Flavobacteriia            |                                |                           |
| C48060       | Order         | Bacteroidetes; Bacteroidia;<br>Bacteroidales                   | Bacteroidetes; Bacteroidia;<br>Flavobacteriia            |                                |                           |
| Scaffold657  | Order         | Bacteroidetes; Bacteroidia;<br>Flavobacteriia                  | Bacteroidetes; Bacteroidia;<br>Bacteroidales             |                                |                           |
| Scaffold565  | Order         | Bacteroidetes; Bacteroidia;<br>Flavobacteriia                  | Bacteroidetes; Bacteroidia;<br>Bacteroidales             |                                |                           |
| Scaffold1048 | Order         | Bacteroidetes; Bacteroidia;<br>Flavobacteriia                  | Bacteroidetes; Bacteroidia;<br>Bacteroidales             |                                |                           |
| Scaffold306  | Order         | Firmicutes; Bacilli; Lactobacillales                           | Firmicutes; Clostridia;<br>Clostridiales                 |                                |                           |
| Scaffold584  | Order         | Firmicutes; Bacilli; Lactobacillales                           | Firmicutes; Bacilli; Bacillales                          |                                |                           |
| caffold504   | Order         | Firmicutes; Bacilli; Lactobacillales                           | Firmicutes; Bacilli; Bacillales                          |                                |                           |
| Scaffold279  | Order         | Firmicutes; Bacilli; Lactobacillales                           | Firmicutes; Bacilli; Bacillales                          |                                |                           |
| Scaffold617  | Order         | Firmicutes; Clostridia; Clostridiales                          | Firmicutes; Clostridia;<br>Thermoanaerobacterales        |                                |                           |
| Scaffold415  | Order         | Proteobacteria;<br>Epsilonproteobacteria;<br>Campylobacterales | Proteobacteria;<br>Epsilonproteobacteria;<br>Nautiliales |                                |                           |
| C48432       | Class         | Firmicutes; Bacilli                                            | Firmicutes; Clostridia                                   |                                |                           |
| Scaffold121  | Class         | Firmicutes; Bacilli                                            | Firmicutes; Clostridia                                   |                                |                           |
| Scaffold799  | Class         | Firmicutes; Bacilli                                            | Firmicutes; Clostridia                                   |                                |                           |
| C48416       | Class         | Firmicutes; Bacilli                                            | Firmicutes; Clostridia                                   |                                |                           |
| C48434       | Class         | Firmicutes; Bacilli                                            | Firmicutes; Clostridia                                   |                                |                           |
| Scaffold66   | Class         | Firmicutes; Bacilli                                            | Firmicutes; Clostridia                                   |                                |                           |
| Scaffold155  | Class         | Firmicutes; Bacilli                                            | Firmicutes; Clostridia                                   |                                |                           |
| Scaffold128  | Class         | Firmicutes; Bacilli                                            | Firmicutes; Clostridia                                   |                                |                           |
| C48366       | Class         | Firmicutes; Clostridia                                         | Firmicutes; Bacilli                                      |                                |                           |
| Scaffold559  | Class         | Firmicutes; Clostridia                                         | Firmicutes; Erysipelotrichi                              |                                |                           |
| Scaffold1082 | Class         | Firmicutes; Clostridia                                         | Firmicutes; Erysipelotrichi                              |                                |                           |
| Scaffold381  | Class         | Firmicutes; Clostridia                                         | Firmicutes; Bacilli                                      |                                |                           |
| C48234       | Class         | Firmicutes; Clostridia                                         | Firmicutes; Bacilli;                                     |                                |                           |
| Scaffold294  | Class         | Firmicutes; Clostridia                                         | Firmicutes; Bacilli                                      |                                |                           |
| C48384       | Class         | Firmicutes; Clostridia                                         | Firmicutes; Negativicutes                                |                                |                           |
| C48404       | Class         | Firmicutes; Clostridia                                         | Firmicutes; Bacilli                                      |                                |                           |
| Scaffold562  | Class         | Firmicutes; Clostridia                                         | Firmicutes; Bacilli                                      | Firmicutes; Clostridia         | Firmicutes;<br>Clostridia |
| Scaffold713  | Class         | Firmicutes; Clostridia                                         | Firmicutes; Negativicutes                                |                                |                           |
| Scaffold695  | Class         | Firmicutes; Clostridia                                         | Firmicutes; Bacilli                                      |                                |                           |
| C48344       | Class         | Firmicutes; Clostridia                                         | Firmicutes; Bacilli                                      |                                |                           |
| C48286       | Class         | Firmicutes; Clostridia                                         | Firmicutes; Bacilli                                      |                                |                           |
| Scaffold406  | Class         | Firmicutes; Clostridia                                         | Firmicutes; Bacilli                                      |                                |                           |
| C48438       | Class         | Firmicutes; Clostridia                                         | Firmicutes; Bacilli                                      | Firmicutes; Bacilli            |                           |
| Scaffold64   | Class         | Firmicutes; Clostridia                                         | Firmicutes; Clostridia                                   | Firmicutes;<br>Erysipelotrichi |                           |
| Scaffold269  | Class         | Firmicutes; Clostridia                                         | Firmicutes; Clostridia                                   | Firmicutes; Bacilli            |                           |
| Scaffold782  | Class         | Firmicutes; Clostridia                                         | Firmicutes; Bacilli                                      |                                |                           |
| Scaffold980  | Class         | Firmicutes; Clostridia                                         | Firmicutes; Bacilli                                      |                                |                           |
| Scaffold181  | Class         | Firmicutes; Clostridia                                         | Firmicutes; Bacilli                                      |                                |                           |
| Scaffold335  | Class         | Firmicutes; Negativicutes                                      | Firmicutes; Bacilli                                      |                                |                           |
| caffold1034  | Class         | Firmicutes; Negativicutes                                      | Firmicutes; Bacilli                                      |                                |                           |
| Scaffold206  | Class         | Firmicutes; Negativicutes                                      | Firmicutes; Clostridia                                   |                                |                           |
| Scaffold453  | Class         | Firmicutes; Negativicutes                                      | Firmicutes; Clostridia                                   |                                |                           |
| C48394       | Class         | Firmicutes; Negativicutes                                      | Firmicutes; Bacilli                                      |                                |                           |
| Scaffold413  | Class         | Proteobacteria;<br>Alphaproteobacteria                         | Proteobacteria;<br>Gammaproteobacteria                   |                                |                           |
| C48392       | Phylum        | Actinobacteria                                                 | Firmicutes                                               |                                |                           |
| caffold1076  | Phylum        | Actinobacteria                                                 | Firmicutes                                               |                                |                           |
| C48360       | Phylum        | Actinobacteria                                                 | Firmicutes                                               | Firmicutes                     |                           |
| Scaffold900  | Phylum        | Actinobacteria                                                 | Proteobacteria                                           |                                |                           |
| C48340       | Phylum        | Actinobacteria                                                 | Firmicutes                                               |                                |                           |
| C48316       | Phylum        | Actinobacteria                                                 | Firmicutes                                               |                                |                           |
| Scaffold166  | Phylum        | Actinobacteria                                                 | Firmicutes                                               |                                |                           |
